# Supplementary material
Source: PubMed Central journal article supplement (PMC3440228)
Supplement: supp_pp.112.202143_202143Table_S1-S2-PP.pdf [file supp_pp.112.202143_202143Table_S1-S2-PP.pdf]

**Table S1.** Primer sequences used for RT-PCR and qRT-PCR

|                                                                            | Primer name         | Sequence (5'-3')                  |
|----------------------------------------------------------------------------|---------------------|-----------------------------------|
| <b>RT-PCR to detect the presence of partial or full-length transcripts</b> |                     |                                   |
| <i>AtPUB18</i>                                                             | 18 FW1              | 5'-CATGATGATGAACTCGGATCA-3'       |
|                                                                            | 18 FW2              | 5'-GATCCGGGAACATCACGT-3' 1        |
|                                                                            | 18 FW3              | 5'-ATATGGAGGAAGCAAGAAGGC-3'       |
|                                                                            | 18 RV1              | 5'-CATCTAACCGTTCTGCATCTATC-3'     |
|                                                                            | 18 RV2              | 5'-CGTTTGTGTTTGCAGTGCTTT-3'       |
|                                                                            | 18 RV3              | 5'-TTGCCATCCCAGTAGCTC-3'          |
| <i>AtPUB19</i>                                                             | 19 FW1              | 5'-GTCGACTCACTTTTACAACCTCGC-3'    |
|                                                                            | 19 FW2              | 5'-CGAGGATCCAAGAGAACGC-3'         |
|                                                                            | 19 FW3              | 5'-TCCACGAGTTTCAGGAGAGG-3'        |
|                                                                            | 19 RW1              | 5'-ATCATCAAATCATCTTCTTCCTTG-3'    |
|                                                                            | 19 RW2              | 5'-TCGGTAATGCTTTATTACATTACAT-3'   |
| <i>UBC10</i>                                                               | ubc10 FW            | 5'-TGGATATGGCGTCGAAGC-3'          |
|                                                                            | ubc10 RV            | 5'-GTGGGATTTTCCATTAGCC-3'         |
| <b>RT-PCR to detect ectopically expressed transcripts</b>                  |                     |                                   |
| <i>AtPUB18</i>                                                             | 18 ox FW 1          | 5'-ACGTGGTCCCGGAGAGTT-3'          |
|                                                                            | 18 ox RV 1          | 5'-CCGCTCGAGTCACCAGGCGTGAACGA-3'  |
| <i>AtPUB19</i>                                                             | 19 ox FW 1          | 5'-CGGAGCTCTATCACAAAGTGG-3'       |
|                                                                            | 19 ox RV 1          | 5'-CAACTCTCCGTTACTTGACGC-3'       |
| <i>AtPUB22</i>                                                             | 22 ox FW 1          | 5'-GAATCTCAACGACATGTGTCAGT-3'     |
|                                                                            | 22 ox RV 1          | 5'-GTCGACTCAAGCAGGATACGAATC-3'    |
| <i>AtPUB23</i>                                                             | 23 ox FW 1          | 5'-GCAACGACTCAGAAAATGGG-3'        |
|                                                                            | 23 ox RV 1          | 5'-CATCAGCAGGGATATGCAAG-3'        |
| <b>qRT-PCR</b>                                                             |                     |                                   |
| <i>AtPUB18</i>                                                             | 18 real-time FW     | 5'-ACGTGGTCCCGGAGAGTT-3'          |
|                                                                            | 18 real-time RV     | 5'-GAAGTGAGAACTTTGCGATGAG-3'      |
| <i>AtPUB19</i>                                                             | 19 real-time FW     | 5'-AGAAAGAGAACGGTTTGTCCAC-3'      |
|                                                                            | 19 real-time RV     | 5'-AGCTCAAAGAGTTATTGTGTATCATCA-3' |
| <i>AtPUB22</i>                                                             | 22 real-time FW     | 5'-CAGAGAGAAGGAATTCAGAGATGG-3'    |
|                                                                            | 22 real-time RV     | 5'-CCTTCTGCGCACTGACATAA-3'        |
| <i>AtPUB23</i>                                                             | 23 real-time FW     | 5'-GAGCCGAGTTCTTGAACCAC-3'        |
|                                                                            | 23 real-time RV     | 5'-CCCTAAGTATCTTCTTGACACACC-3'    |
| <i>RD29A</i>                                                               | rd29a real-time FW  | 5'-GTTACTGATCCCACCAAAGAAGA-3'     |
|                                                                            | rd29a real-time RV  | 5'-GGAGACTCATCAGTCACTTCCA-3'      |
| <i>AtCBF1</i>                                                              | cbf1 real-time FW   | 5'-AATCCCGGAGTCAACATGC-3'         |
|                                                                            | cbf1 real-time RV   | 5'-TCTCATCTTGAAAAGCCAACG-3'       |
| <i>RAB18</i>                                                               | rab18 real-time FW  | 5'-GGCTTGGGAGGAATGCTT-3'          |
|                                                                            | rab18 real-time RV  | 5'-TTGATCTTTTGTGTTATTCCCTTCT-3'   |
| <i>GAPDHc</i>                                                              | gapdhc real-time FW | 5'-TGAAATCAAAAAGCTATCAAGG-3'      |
|                                                                            | gapdhc real-time RV | 5'-CATCATCCTCGGTGTATCCAA-3'       |

**Table S2.** Primer sequences used for genotyping PCR and constructions

|                        | Primer name     | Sequence (5'-3')                          |
|------------------------|-----------------|-------------------------------------------|
| <b>Genotyping PCR</b>  |                 |                                           |
| <i>SnRK2.2</i>         | snrk2.2 geno FW | 5'-GCCTTCCCATTGGCTATTG-3'                 |
|                        | snrk2.2 geno RV | 5'-CGAAGATCCTCGATATTAGATGG-3'             |
| <i>SnRK2.3</i>         | snrk2.3 geno FW | 5'-CGGATTTGCAATGCAGGAC-3'                 |
|                        | snrk2.3 geno RV | 5'-G TTCAGGCTCCTGGA ACTGG-3'              |
| <i>SnRK2.6</i>         | snrk2.6 geno FW | 5'-GAGAACTTTTCGAGCGAATCTG-3'              |
|                        | Snrk2.6 geno RV | 5'-CAGGGTCAGCAACAAATATTCTG-3'             |
| T-DNA border           | LBa1            | 5'-TGGTTCACGTAGTGGGCCATCG -3'             |
|                        | LB2             | 5'-GCTTCCTATTATATCTTCCCAAATTACCAATACA -3' |
|                        | pAC106          | 5'-GTATCTGGGAATGGCGAAATC-3'               |
| <b>Constructions</b>   |                 |                                           |
| <i>35S:AtPUB18</i>     | 18 ox FW 2      | 5'-CACCATGATCCATACGAAAACCGG -3'           |
|                        | 18 ox RV 2      | 5'-TTGCCATCCCAGTAGCTC -3'                 |
| <i>35S:AtPUB19</i>     | 19 ox FW 2      | 5'-ACTAGTAATGATCCATACACCAACCGG -3'        |
|                        | 19 ox RV 2      | 5'-CCGCTCGAGTCACCAGGCGTGGACAA -3'         |
| <i>35S:AtPUB22</i>     | 22 ox FW 2      | 5'-GTCGACATGGATCAAGAGATAGAGATTCCTTC -3'   |
|                        | 22 ox RV 2      | 5'-GTCGACAGCAGGATACGAATCATACAAATTC -3'    |
| <i>35S:AtPUB23</i>     | 23 ox FW 2      | 5'-GAATTCATGTCCGGAGGAATAATGGATG -3'       |
|                        | 23 ox RV 2      | 5'-GAATTCGCAGGGATATGCAAGAATCATG -3'       |
| <i>AtPUB18 pro-GUS</i> | 18 pro FW       | 5'-GCAACCGGCCATTGTT-3'                    |
|                        | 18 pro RV       | 5'-GCTGCTATGACTTTGTAGATTAAAGT-3'          |
| <i>AtPUB19 pro-GUS</i> | 19 pro FW       | 5'-GTGTAGTCGGGCTATACTGGA-3'               |
|                        | 19 pro RV       | 5'-ATAAAGATAAGATATGAGTGAAAACAAA-3'        |
| <i>AtPUB22 pro-GUS</i> | 22 pro FW       | 5'-CACCGACTTTTTCGTAATATATGC-3'            |
|                        | 22 pro RV       | 5'-CTTCAAAGTGCAGTCGTTGAG-3'               |
| <i>AtPUB23 pro-GUS</i> | 23 pro FW       | 5'-CACCCGTCATCAA ACTATTCCATG -3'          |
|                        | 23 pro RV       | 5'-TTTGGGAAGATGTGAATTGG-3'                |
